# Supplementary material for: Digestive diversity and kinetic intrigue among heated and unheated β-lactoglobulin species
Source: Royal Society of Chemistry journal article supplement (doi:10.1039/c4fo00362d), 2014-01-01

# Electronic Supplementary Information for: **Digestive diversity and kinetic intrigue among heated and unheated $\beta$ -lactoglobulin species**

Simon M. Loveday, Malleswara R. Peram, Harjinder Singh, Aiqian Ye, Geoffrey B. Jameson

Circular dichroism spectra of pepsin in simulated gastric fluid incubated at 37 °C.  
A: Near UV.

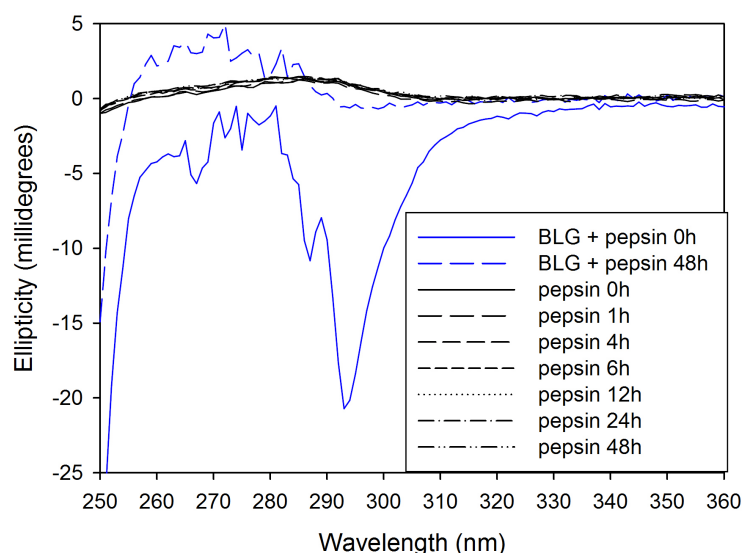

B: Far UV.

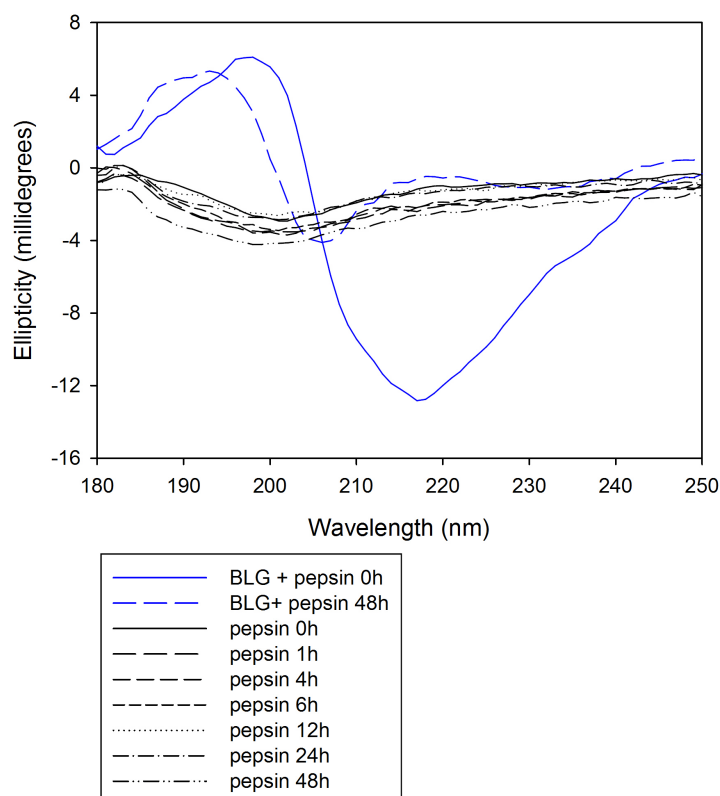

Changes in sample pH during peptic digestion of native  $\beta$ -lg in simulated gastric fluid

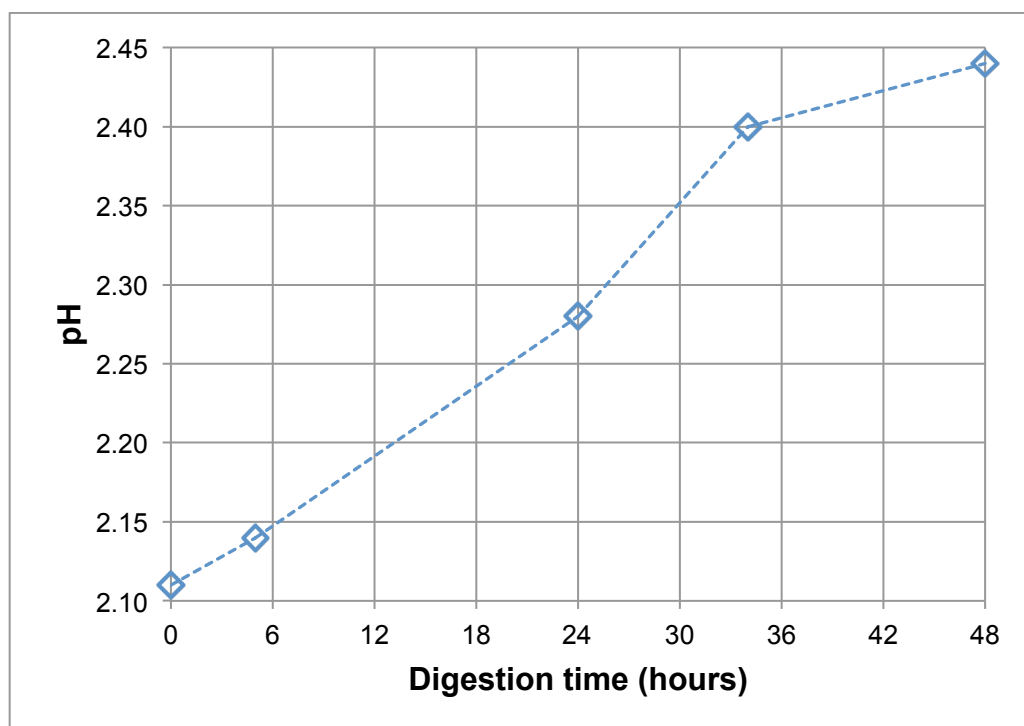

Supplement: c4fo00362d1.pdf [file c4fo00362d1.pdf]
